# Supplementary material for: Assessment of Dietary Intake and Nutrient Gaps, and Development of Food-Based Recommendations, among Pregnant and Lactating Women in Zinder, Niger: An Optifood Linear Programming Analysis
Source: PubMed Central journal article supplement (PMC6357040; doi:10.3390/nu11010072), 2019-01-02
Supplement: nutrients-11-00072-s001.pdf [file nutrients-11-00072-s001.pdf]

**Table S1.** Nutrient composition of intervention products modeled using the Optifood software tool<sup>1</sup>.

| Nutrient                    | Iron and folic acid (IFA) | UNIMMAP | SQ-LNS P&L | Supercereal (CSB +) <sup>2</sup><br>Premix + Intrinsic | Plumpy'Mum |
|-----------------------------|---------------------------|---------|------------|--------------------------------------------------------|------------|
| Dose, g                     |                           |         | 20         | 100                                                    | 92         |
| Energy, kcal                |                           |         | 118        | 380                                                    | 515        |
| Carbohydrate, g             |                           |         |            | 64.3                                                   | 33.1       |
| Fat, g                      |                           |         | 10         | 2.5                                                    | 36.6       |
| Protein, g                  |                           |         | 2.6        | 13.3                                                   | 14.4       |
| Vitamin A, µg RAE           |                           | 800     | 800        | 980                                                    | 881        |
| Vitamin C, mg               |                           | 70      | 100        | 91                                                     | 71         |
| Thiamin, mg                 |                           | 1.4     | 2.8        | 0.7                                                    | 1.6        |
| Riboflavin, mg              |                           | 1.4     | 2.8        | 1.7                                                    | 1.6        |
| Niacin, mg                  |                           | 18      | 36         | 11.2                                                   | 21         |
| Vitamin B-6, mg             |                           | 1.9     | 3.8        | 1.6                                                    | 2          |
| Folate, µg DFE <sup>3</sup> | 680                       | 680     | 680        | 200                                                    | 783        |
| Vitamin B-12, µg            |                           | 2.6     | 5.2        | 2.0                                                    | 2.6        |
| Iron, mg                    | 60                        | 30      | 20         | 11.8                                                   | 35         |
| Zinc, mg                    |                           | 15      | 30         | 7.7                                                    | 17         |
| Calcium, mg                 |                           | 0       | 280        | 512                                                    | 111        |

<sup>1</sup> CSB+, corn soy blend plus; DFE, dietary folate equivalents; IFA, iron and folic acid supplement; SQ-LNS, small-quantity lipid-based nutrient supplement; P&L, pregnancy and lactation; RAE, retinol activity equivalent. <sup>2</sup> Nutrient composition of premix and intrinsic ingredients from [<https://www.usaid.gov/what-we-do/agriculture-and-food-security/food-assistance/resources/implementation-tools/corn-soy>]; USDA retention factors for cooking were applied to appropriate micronutrients [29]. Models which included 1 serving of Supercereal per day also included 1 serving/day of vitamin A fortified vegetable oil (10.5 – 10.7 g) and 1-2 servings/day of sugar (6.3 – 8.5 g) per 100g Supercereal serving, based on local food patterns. <sup>3</sup> IFA, UNIMMAP and SQ-LNS P&L contain 400 µg folic acid, Plumpy'Mum contains 461 µg folic acid; it was assumed that all intervention products were taken with food or fortified food (DFE = µg folic acid \* 1.7) [38].

**Table S2.** Recommended Dietary Allowances (RDA) used for analyses<sup>1,2</sup>

| Nutrient               | Pregnant women | Lactating women |
|------------------------|----------------|-----------------|
| Energy, kcal/d         | 2674.5         | 2622.2          |
| Carbohydrate, g/d      | ---            | ---             |
| Fat, % of total energy | 20%            | 20%             |
| Protein, g/d           | 61.8           | 68.4            |
| Vitamin A, µg RAE/d    | 770            | 1300            |
| Vitamin C, mg/d        | 85             | 120             |
| Thiamin, mg/d          | 1.4            | 1.4             |
| Riboflavin, mg/d       | 1.4            | 1.6             |
| Niacin, mg/d           | 18             | 17              |
| Vitamin B-6, mg/d      | 1.9            | 2.0             |
| Folate, µg DFE/d       | 600            | 500             |
| Vitamin B-12, µg/d     | 2.6            | 2.8             |
| Iron, mg/d             | 27             | 18              |
| Zinc, mg/d             | 11             | 12              |
| Calcium, mg/d          | 1000           | 1000            |

<sup>1</sup> DFE, dietary folate equivalents; RAE, retinol activity equivalent; RDA, recommended dietary allowance. <sup>2</sup>Data from [34-38], unless otherwise noted. Estimated energy requirement (EER) =  $354 - (6.91 \times \text{age [y]}) + \text{PA} \times \{(9.36 \times \text{weight [kg]}) + (726 \times \text{height [m]})\} + \text{physiological group adjustment}$ , where physical activity (PA) = 1.27 (active), and physiological group adjustments were as follows: 2<sup>nd</sup> trimester pregnancy = + 330; 3<sup>rd</sup> trimester pregnancy = + 452; 0-6 month postpartum = +330; 7-23 months postpartum = + 400. Fat recommendation was set at the lower end of the acceptable range (20-35%) to increase likelihood of requirement being met. Protein recommendation: pregnant women = 1.1 \* body weight (kg); lactating women = 1.3 \* body weight (kg). Iron recommendation assumed 25% absorption during 2<sup>nd</sup> and 3<sup>rd</sup> trimesters for pregnant women, 10% absorption for lactating women [3, 39]. Models were also run using calcium recommendations (800 mg/d) from the WHO/FAO for settings where animal source foods provide less than 20-40 g/d of protein [36].

1  
2

**Table S3.** Food serving size (g/day) and food consumption patterns (number of servings per week by percentiles) in pregnant and lactating study participants<sup>1</sup>

|                                              | Pregnant women (n=113 24h recalls) |                                 |                                                    |                                                | Lactating women (n=122 24h recalls) |                                 |                                                    |                                                |
|----------------------------------------------|------------------------------------|---------------------------------|----------------------------------------------------|------------------------------------------------|-------------------------------------|---------------------------------|----------------------------------------------------|------------------------------------------------|
|                                              | Frequency (servings/week)          |                                 |                                                    |                                                | Frequency (servings/week)           |                                 |                                                    |                                                |
|                                              | n (%) of recalls consumed          | Median serving size (g/serving) | Maximum (90 <sup>th</sup> percentile) <sup>2</sup> | Maximum (adjusted for added meal) <sup>3</sup> | n (%) of recalls consumed           | Median serving size (g/serving) | Maximum (90 <sup>th</sup> percentile) <sup>2</sup> | Maximum (adjusted for added meal) <sup>3</sup> |
| <i>Added fats</i>                            |                                    |                                 |                                                    |                                                |                                     |                                 |                                                    |                                                |
| Palm oil                                     | 106 (93.8)                         | 10.5                            | 21                                                 | 24                                             | 114 (93.4)                          | 10.7                            | 21                                                 | 28                                             |
| Peanut oil                                   | 11 (9.7)                           | 7.7                             | 1                                                  | 2                                              | 7 (5.7)                             | 5.6                             | 1                                                  | 2                                              |
| <i>Added sugars</i>                          |                                    |                                 |                                                    |                                                |                                     |                                 |                                                    |                                                |
| Sugar, granulated                            | 13 (11.5)                          | 3.2                             | 1                                                  | 2                                              | 21 (17.2)                           | 8.5                             | 3                                                  | 6                                              |
| <i>Dairy products</i>                        |                                    |                                 |                                                    |                                                |                                     |                                 |                                                    |                                                |
| Milk, curdled, whole                         | 23 (20.4)                          | 106.9                           | 7                                                  | 14                                             | 36 (29.5)                           | 106.9                           | 7                                                  | 14                                             |
| <i>Grains and grain products<sup>4</sup></i> |                                    |                                 |                                                    |                                                |                                     |                                 |                                                    |                                                |
| Pearl millet flour                           | 83 (73.4)                          | 183.2                           | 14                                                 | 21                                             | 104 (85.2)                          | 236.1                           | 15                                                 | 21                                             |
| Sorghum flour                                | 16 (14.2)                          | 168.4                           | 6                                                  | 12                                             | 31 (25.4)                           | 190.2                           | 11                                                 | 17                                             |
| Maize flour                                  | 26 (23.0)                          | 204.0                           | 7                                                  | 14                                             | 28 (23.0)                           | 209.0                           | 7                                                  | 14                                             |
| Rice, white, boiled                          | 68 (60.2)                          | 277.8                           | 7                                                  | 14                                             | 56 (45.9)                           | 258.8                           | 5                                                  | 10                                             |
| Wheat flour, white                           | 18 (15.9)                          | 65.7                            | 2                                                  | 4                                              | 20 (16.4)                           | 43.8                            | 3                                                  | 6                                              |
| Macaroni, wheat                              | 11 (9.7)                           | 100.0                           | 1                                                  | 2                                              | 13 (10.7)                           | 134.0                           | 1                                                  | 2                                              |
| <i>Legumes, nuts and seeds</i>               |                                    |                                 |                                                    |                                                |                                     |                                 |                                                    |                                                |
| Cowpeas, dried, boiled                       | 84 (74.3)                          | 57.3                            | 13                                                 | 21                                             | 84 (68.9)                           | 43.2                            | 12                                                 | 21                                             |
| Cowpeas, fresh, boiled                       | 6 (5.3)                            | 119.2                           | 1                                                  | 2                                              | 7 (5.7)                             | 245.0                           | 1                                                  | 2                                              |
| Groundnuts                                   | 7 (6.2)                            | 12.7                            | 1                                                  | 2                                              | 8 (6.6)                             | 5.9                             | 1                                                  | 2                                              |
| Groundnut flour, defatted                    | 6 (5.3)                            | 6.8                             | 1                                                  | 2                                              | ---                                 | ---                             | ---                                                | ---                                            |
| Locust bean, fermented                       | 78 (69.0)                          | 2.5                             | 14                                                 | 21                                             | 94 (77.0)                           | 2.4                             | 14                                                 | 21                                             |
| Soy flour                                    | 13 (11.5)                          | 15.9                            | 2                                                  | 4                                              | 9 (7.4)                             | 29.3                            | 1                                                  | 2                                              |
| <i>Meat, fish &amp; eggs</i>                 |                                    |                                 |                                                    |                                                |                                     |                                 |                                                    |                                                |
| Lamb, cooked                                 | 7 (6.2)                            | 13.1                            | 1                                                  | 2                                              | ---                                 | ---                             | ---                                                | ---                                            |
| <i>Vegetables</i>                            |                                    |                                 |                                                    |                                                |                                     |                                 |                                                    |                                                |

|                             |            |      |    |    |            |      |     |     |
|-----------------------------|------------|------|----|----|------------|------|-----|-----|
| Baobab leaves, dried        | 46 (40.7)  | 5.3  | 10 | 15 | 54 (44.3)  | 3.9  | 14  | 21  |
| False sesame, dried         | 7 (6.2)    | 7.4  | 1  | 2  | ---        | ---  | --- | --- |
| Jute leaves, fresh          | 29 (25.7)  | 29.1 | 4  | 8  | 41 (33.6)  | 34.2 | 7   | 14  |
| Roselle leaves, fresh       | 20 (17.7)  | 33.4 | 2  | 4  | 19 (15.6)  | 22.2 | 2   | 4   |
| Leaves, other, boiled       | 7 (6.2)    | 66.7 | 1  | 2  | ---        | ---  | --- | --- |
| Garlic, fresh               | 47 (41.6)  | 0.5  | 10 | 15 | 48 (39.3)  | 0.5  | 14  | 21  |
| Onion, fresh                | 79 (69.9)  | 6.8  | 14 | 21 | 75 (61.5)  | 7.2  | 18  | 24  |
| Okra, dried                 | 10 (8.8)   | 2.3  | 1  | 2  | 10 (8.2)   | 6.3  | 1   | 2   |
| Peppers, chili, fresh       | 45 (39.8)  | 1.4  | 7  | 14 | 47 (38.5)  | 2.5  | 14  | 21  |
| Tomato, fresh               | 15 (13.3)  | 6.4  | 1  | 2  | 14 (11.5)  | 7.2  | 2   | 4   |
| Tomato, dried               | 50 (44.2)  | 2.5  | 14 | 21 | 63 (51.6)  | 2.6  | 18  | 24  |
| Tomato, paste               | 39 (34.5)  | 3.4  | 7  | 14 | 38 (31.1)  | 3.9  | 14  | 21  |
| Squash, orange flesh, fresh | 12 (10.6)  | 23.4 | 1  | 2  | 24 (19.7)  | 33.2 | 3   | 6   |
| <i>Miscellaneous</i>        |            |      |    |    |            |      |     |     |
| Pepper, black               | 37 (32.7)  | 0.3  | 7  | 14 | 43 (35.2)  | 0.4  | 14  | 21  |
| Salt, table                 | 108 (95.6) | 2.6  | 21 | 28 | 114 (93.4) | 2.9  | 21  | 28  |
| Peppers, chili, dried       | 23 (20.4)  | 2.4  | 2  | 4  | 26 (21.3)  | 0.8  | 5   | 10  |
| Bouillon cubed, dry         | 99 (87.6)  | 1.4  | 16 | 21 | 116 (95.1) | 1.4  | 21  | 28  |

3 <sup>1</sup>Foods consumed by >5% of participants are considered “common foods” and included in this list. All values are presented based on edible portion only,  
4 and assume the food is raw, unless otherwise noted. <sup>2</sup>Maximum frequency was defined as the 90<sup>th</sup> percentile of the food frequency distribution for each  
5 group (pregnant and lactating women), with a lower limit of 1 serving/week and an upper limit of 21 servings/week. <sup>3</sup>Maximum frequency (adjusted for  
6 an additional meal) depended on the reported consumption frequency at the 90<sup>th</sup> percentile, such that the maximum allowable frequency of consumption  
7 was proportionate to the reported consumption, with an upper limit at the 100<sup>th</sup> percentile of reported consumption. <sup>4</sup>Median serving sizes (g/d) for staple  
8 foods (grains and grain products) were defined as the 75<sup>th</sup> percentile, to allow for adequate flexibility to modeled energy.

**Table S4.** Consumption patterns of food groups and food subgroups (number of servings per week by percentiles) in pregnant and lactating study participants.

|                                              | Pregnant women                             |                                                          |                                 | Lactating women                            |                                             |                                 |
|----------------------------------------------|--------------------------------------------|----------------------------------------------------------|---------------------------------|--------------------------------------------|---------------------------------------------|---------------------------------|
|                                              | Frequency (servings/week)                  |                                                          |                                 | Frequency (servings/week)                  |                                             |                                 |
|                                              | Median<br>(50 <sup>th</sup><br>percentile) | Maximum<br>(90 <sup>th</sup><br>percentile) <sup>1</sup> | Maximum<br>(additional<br>meal) | Median<br>(50 <sup>th</sup><br>percentile) | Maximum<br>(90 <sup>th</sup><br>percentile) | Maximum<br>(additional<br>meal) |
| <i>Added fats</i>                            | 13                                         | 21                                                       | 24                              | 12.5                                       | 21                                          | 28                              |
| Vegetable oil                                |                                            | 21                                                       | 24                              |                                            | 21                                          | 28                              |
| <i>Added sugars</i>                          | 0.1                                        | 1                                                        | 2                               | 0.1                                        | 3                                           | 6                               |
| Sugar                                        |                                            | 1                                                        | 2                               |                                            | 3                                           | 6                               |
| <i>Dairy products</i>                        | 0.1                                        | 7                                                        | 14                              | 0.1                                        | 7                                           | 14                              |
| Fluid or powdered milk                       |                                            | 7                                                        | 14                              |                                            | 7                                           | 14                              |
| <i>Grains and grain products</i>             | 11                                         | 19                                                       | 28                              | 14                                         | 23                                          | 28                              |
| Refined grains and products                  |                                            | 18                                                       | 24                              |                                            | 21                                          | 28                              |
| Whole grains and products                    |                                            | 7                                                        | 14                              |                                            | 7                                           | 14                              |
| <i>Legumes, nuts and seeds</i>               | 10                                         | 22                                                       | 28                              | 10                                         | 27                                          | 36                              |
| Cooked beans, lentils, peas                  |                                            | 13                                                       | 21                              |                                            | 12                                          | 18                              |
| Nuts, seeds and unsweetened products         |                                            | 14                                                       | 21                              |                                            | 16                                          | 21                              |
| Soybeans and products                        |                                            | 2                                                        | 4                               |                                            | 1                                           | 2                               |
| <i>Meat, fish &amp; eggs</i>                 | 0.1                                        | 1                                                        | 2                               | ---                                        | ---                                         | ---                             |
| Red meat                                     |                                            | 1                                                        | 2                               |                                            | ---                                         | ---                             |
| <i>Vegetables</i>                            | 15                                         | 57                                                       | 75                              | 21.5                                       | 69                                          | 92                              |
| Vitamin A source dark green leafy vegetables |                                            | 14                                                       | 21                              |                                            | 14                                          | 21                              |
| Vitamin A source other vegetables            |                                            | 1                                                        | 2                               |                                            | 3                                           | 6                               |
| Condiment vegetables                         |                                            | 42                                                       | 56                              |                                            | 56                                          | 75                              |
| Other vegetables                             |                                            | 2                                                        | 4                               |                                            | 3                                           | 6                               |
| <i>Miscellaneous</i>                         | 25                                         | 42                                                       | 56                              | 27                                         | 56                                          | 75                              |
| Condiments, herbs, spices                    |                                            | 42                                                       | 56                              |                                            | 56                                          | 75                              |

<sup>1</sup> Maximum frequency was defined as the 90<sup>th</sup> percentile of the food frequency distribution for each group (pregnant and lactating women), with a lower limit of 1 serving/week and no upper limit to servings/week. <sup>2</sup> Maximum frequency (adjusted for an additional meal) depended on the reported consumption frequency at the 90<sup>th</sup> percentile, such that the maximum allowable frequency of consumption was proportionate to the reported consumption, with an upper limit at the 100<sup>th</sup> percentile of reported consumption.

**Table S5.** Market availability and prices of foods from 55 market surveys conducted at 10 markets in the study area over a period of 18 months<sup>1</sup>.

| Availability, n (%) | Median price (CFA/100g) |
|---------------------|-------------------------|
|---------------------|-------------------------|

|                                                  | June – Sept | Oct – Feb | Mar – May | Overall   | June – Sept             | Oct – Feb               | Mar – May               | Overall                 |
|--------------------------------------------------|-------------|-----------|-----------|-----------|-------------------------|-------------------------|-------------------------|-------------------------|
| <i>Added fats</i>                                |             |           |           |           |                         |                         |                         |                         |
| Butter                                           | 9 (29.0)    | 1 (9.1)   | 1 (8.3)   | 11 (20.4) | 177.8<br>(120.0, 181.8) | 344.4                   | 177.8                   | 177.8<br>(120.0, 244.4) |
| Margarine, fortified                             | 9 (29.0)    | 1 (9.1)   | 1 (8.3)   | 11 (20.4) | 181.8<br>(150.0, 200.0) | 420.0                   | 120.0                   | 181.8<br>(120.0, 320.0) |
| Palm oil, fortified <sup>2</sup>                 | 25 (80.7)   | 10 (90.9) | 10 (83.3) | 45 (83.3) | 81.3<br>(81.3, 89.3)    | 81.3<br>(81.3, 92.1)    | 82.7<br>(81.3, 86.7)    | 81.3<br>(81.3, 86.7)    |
| Peanut oil, fortified                            | 27 (87.1)   | 9 (81.8)  | 11 (91.7) | 47 (87.0) | 130.1<br>(108.4, 137.9) | 108.4<br>(97.6, 108.4)  | 119.2<br>(104.2, 130.1) | 119.2 (100.0,<br>130.1) |
| <i>Dairy products</i>                            |             |           |           |           |                         |                         |                         |                         |
| Milk, curdled, whole                             | 27 (87.1)   | 6 (54.6)  | 8 (66.7)  | 41 (75.9) | 50.0<br>(33.3, 86.4)    | 62.2<br>(31.6, 89.3)    | 41.2<br>(28.0, 48.0)    | 49.0<br>(31.6, 74.6)    |
| Milk, powdered                                   | 31 (100)    | 9 (81.8)  | 12 (100)  | 52 (96.3) | 380.0<br>(340.9, 400.0) | 350.0<br>(350.0, 420.0) | 365.0<br>(345.0, 390.0) | 380.0<br>(347.5, 400.0) |
| <i>Grains and grain products</i>                 |             |           |           |           |                         |                         |                         |                         |
| Maize                                            | 30 (93.8)   | 10 (90.9) | 12 (100)  | 52 (94.6) | 17.8<br>(17.0, 20.3)    | 21.1<br>(15.8, 24.6)    | 17.8<br>(16.7, 19.7)    | 18.0<br>(16.8, 20.7)    |
| Pearl millet<br>( <i>Pennisetum glaucum</i> )    | 32 (100)    | 10 (90.9) | 12 (100)  | 54 (98.2) | 27.1<br>(25.1, 32.1)    | 29.9<br>(25.5, 34.4)    | 28.1<br>(22.8, 30.4)    | 27.5<br>(25.1, 31.9)    |
| Pearl millet<br>( <i>Pennisetum americanum</i> ) | 16 (50.0)   | 3 (27.3)  | 5 (41.7)  | 24 (43.6) | 30.1<br>(23.4, 86.9)    | 12.2<br>(11.6, 29.5)    | 26.1<br>(23.8, 27.9)    | 27.0<br>(22.6, 72.9)    |
| Sorghum, red                                     | 29 (90.6)   | 8 (72.7)  | 11 (91.7) | 48 (87.3) | 25.7<br>(21.9, 29.0)    | 21.6<br>(16.5, 27.6)    | 24.2<br>(20.6, 25.6)    | 25.1<br>(20.9, 27.8)    |
| Sorghum, white                                   | 25 (78.1)   | 8 (72.3)  | 10 (83.3) | 43 (78.2) | 26.4<br>(21.7, 29.8)    | 23.8<br>(15.7, 25.2)    | 23.8<br>(20.0, 26.2)    | 25.1<br>(21.4, 28.6)    |
| Rice, white                                      | 31 (96.9)   | 10 (90.9) | 11 (91.7) | 52 (94.6) | 50.0<br>(50.0, 50.0)    | 50.0<br>(50.0, 55.0)    | 50.0<br>(50.0, 54.8)    | 50.0<br>(50.0, 50.0)    |
| Wheat, couscous                                  | 28 (87.5)   | 7 (63.6)  | 9 (75.0)  | 44 (80.0) | 61.25<br>(60.0, 65.0)   | 65.0<br>(62.5, 75.0)    | 65.0<br>(64.4, 85.0)    | 65.0<br>(60.0, 67.5)    |
| Wheat, flour, white                              | 27 (84.4)   | 8 (72.7)  | 8 (66.7)  | 43 (78.2) | 40.0<br>(40.0, 44.6)    | 43.9<br>(40.0, 50.5)    | 40.0<br>(40.0, 45.1)    | 40.0<br>(40.0, 45.0)    |
| Wheat, macaroni                                  | 32 (100)    | 11 (100)  | 12 (100)  | 55 (100)  | 65.0<br>(60.0, 65.0)    | 65.0<br>(65.0, 65.0)    | 65.0<br>(61.2, 72.5)    | 65.0<br>(60.0, 65.0)    |
| <i>Legumes, nuts and seeds</i>                   |             |           |           |           |                         |                         |                         |                         |

|                              |                        |                       |                         |           |                                     |                                   |                                     |                         |
|------------------------------|------------------------|-----------------------|-------------------------|-----------|-------------------------------------|-----------------------------------|-------------------------------------|-------------------------|
| Cowpeas, dried               | 31 (96.9)              | 11 (100)              | 11 (91.7)               | 53 (96.4) | 40.3<br>(34.7, 53.0)                | 30.9<br>(27.2, 38.2)              | 40.0<br>(31.5, 51.0)                | 37.3<br>(32.4, 50.0)    |
| Groundnuts <sup>3</sup>      | 28 (87.5)              | 6 (54.6)              | 9 (75.0)                | 43 (78.2) | 74.0<br>(67.6, 89.3)                | 67.6<br>(63.7, 108.7)             | 73.6<br>(55.9, 109.0)               | 71.7<br>(63.7, 108.7)   |
| Groundnuts, butter           | 21 (65.6)              | 8 (72.7)              | 9 (75.0)                | 38 (69.1) | 92.6<br>(47.2, 111.1)               | 68.2<br>(37.0, 112.1)             | 83.3<br>(80.6, 108.7)               | 83.3<br>(47.2, 111.1)   |
| Sesame seed                  | 11 (34.4)              | 5 (45.5)              | 2 (16.7)                | 18 (32.7) | 64.5<br>(58.1, 113.6)               | 108.7<br>(57.8, 111.1)            | 54.8<br>(42.9, 66.7)                | 65.6<br>(57.8, 111.1)   |
| Locust bean, fermented       | 31 (96.9) <sup>a</sup> | 6 (54.6) <sup>b</sup> | 9 (75.0) <sup>a,b</sup> | 46 (83.6) | 178.6<br>(100.0, 263.2)             | 179.5<br>(156.3, 222.2)           | 166.7<br>(138.9, 250.0)             | 172.6<br>(111.1, 250.0) |
| Soybeans, dried              | 18 (56.3)              | 4 (36.4)              | 5 (41.7)                | 27 (49.1) | 56.0<br>(37.8, 60.0)                | 49.1<br>(46.3, 71.7)              | 47.1<br>(40.0, 56.4)                | 50.8<br>(38.8, 60.0)    |
| <i>Starchy Roots</i>         |                        |                       |                         |           |                                     |                                   |                                     |                         |
| Cassava                      | 30 (100)               | 11 (100)              | 11 (91.7)               | 52 (98.1) | 40.4<br>(37.2, 50.4)                | 36.7<br>(24.2, 50.4)              | 39.2<br>(32.3, 58.6)                | 39.7<br>(32.3, 50.4)    |
| Potato, white flesh          | 11 (34.4)              | 2 (18.2)              | 5 (41.7)                | 18 (32.7) | 71.4<br>(41.7, 107.1)               | 59.5<br>(59.5, 59.5)              | 56.2<br>(47.6, 59.2)                | 59.5<br>(47.6, 93.6)    |
| Sweet potato, white flesh    | 17 (53.1)              | 8 (72.7)              | 9 (75.0)                | 34 (61.8) | 28.6<br>(23.8, 49.6)                | 27.7<br>(16.8, 41.1)              | 30.4<br>(20.1, 45.6)                | 29.2<br>(18.5, 45.6)    |
| Yam                          | 9 (28.1)               | 7 (63.6)              | 2 (16.7)                | 18 (32.7) | 112.2 <sup>a</sup><br>(40.3, 125.3) | 31.8 <sup>b</sup><br>(30.2, 40.5) | 49.5 <sup>a,b</sup><br>(43.2, 55.8) | 41.8<br>(36.2, 112.2)   |
| <i>Meat, fish &amp; eggs</i> |                        |                       |                         |           |                                     |                                   |                                     |                         |
| Beef, fresh, raw             | 11 (34.4)              | 3 (27.3)              | 4 (33.3)                | 18 (32.7) | 138.2<br>(109.9, 166.7)             | 222.2<br>(192.7, 274.0)           | 145.8<br>(119.3, 176.8)             | 146.8<br>(125.6, 167.8) |
| Beef liver, fresh, raw       | 10 (31.3)              | 2 (18.2)              | 2 (16.7)                | 14 (25.5) | 223.1<br>(211.9, 360.0)             | 230.4<br>(161.5, 299.4)           | 342.0<br>(310.6, 373.4)             | 266.0<br>(211.9, 360.0) |
| Beef, offal, raw             | 9 (28.1)               | 3 (27.3)              | 3 (25.0)                | 15 (27.3) | 226.9<br>(200.0, 238.6)             | 221.2<br>(109.7, 253.4)           | 227.3<br>(178.6, 247.5)             | 226.9<br>(178.6, 242.7) |
| Chicken, whole <sup>4</sup>  | 28 (87.5)              | 10 (90.9)             | 9 (75.0)                | 47 (85.5) | 239.0<br>(191.2, 274.9)             | 239.0<br>(191.2, 286.8)           | 191.2<br>(167.3, 239.0)             | 239.0<br>(191.2, 286.8) |
| Crickets, fresh, raw         | 9 (28.1)               | 3 (27.3)              | 4 (33.3)                | 16 (29.1) | 316.1<br>(186.5, 459.2)             | 169.8<br>(90.1, 217.4)            | 220.0<br>(130.5, 419.6)             | 214.0<br>(163.0, 387.6) |
| Duck, whole <sup>4</sup>     | 19 (59.4)              | 8 (72.7)              | 9 (75.0)                | 36 (65.5) | 236.6<br>(197.2, 276.0)             | 197.2<br>(118.3, 285.9)           | 197.2<br>(157.7, 276.0)             | 216.9<br>(157.7, 276.0) |
| Goat, fresh, raw             | 28 (87.5)              | 10 (90.9)             | 12 (100)                | 50 (90.9) | 140.6                               | 216.6                             | 150.6                               | 150.6                   |

|                                                     |                        |                       |                       |           |                         |                         |                         |                         |
|-----------------------------------------------------|------------------------|-----------------------|-----------------------|-----------|-------------------------|-------------------------|-------------------------|-------------------------|
| Goat liver, fresh, raw                              | 26 (81.3)              | 7 (63.6)              | 8 (66.7)              | 41 (74.6) | (116.3, 161.7)<br>268.1 | (134.0, 378.8)<br>324.7 | (99.4, 187.0)<br>227.8  | (116.3, 187.3)<br>261.5 |
| Goat offal, raw                                     | 26 (81.3)              | 8 (72.7)              | 10 (83.3)             | 44 (80.0) | (196.9, 369.5)<br>151.7 | (187.5, 437.2)<br>178.8 | (150.5, 373.4)<br>144.4 | (196.1, 370.4)<br>157.7 |
| Guinea fowl, whole <sup>4</sup>                     | 28 (87.5)              | 10 (90.9)             | 9 (75.0)              | 47 (85.5) | (103.0, 240.0)<br>322.7 | (141.5, 357.4)<br>286.8 | (125.0, 229.4)<br>274.9 | (122.1, 239.6)<br>286.8 |
| Pigeon, whole <sup>4</sup>                          | 20 (62.5)              | 9 (81.8)              | 5 (41.7)              | 34 (61.8) | (286.8, 382.4)<br>251.3 | (286.8, 334.6)<br>150.8 | (227.1, 298.8)<br>251.3 | (286.8, 334.6)<br>251.3 |
| Mutton, fresh                                       | 19 (59.4)              | 5 (45.5)              | 5 (41.7)              | 29 (52.7) | (226.1, 301.5)<br>152.9 | (125.6, 251.3)<br>155.8 | (150.8, 251.3)<br>202.0 | (175.9, 301.5)<br>155.0 |
| Mutton, liver, fresh, raw                           | 17 (53.1)              | 5 (45.5)              | 2 (16.7)              | 24 (43.6) | (133.3, 187.5)<br>300.3 | (137.0, 300.0)<br>169.1 | (151.5, 300.0)<br>326.5 | (135.2, 216.4)<br>283.5 |
| Mutton, offal, raw                                  | 19 (59.4)              | 5 (45.5)              | 3 (25.0)              | 27 (49.1) | (200.0, 365.6)<br>142.0 | (112.4, 404.4)<br>207.8 | (266.7, 386.4)<br>144.8 | (193.1, 378.4)<br>144.8 |
| Fish, fresh, smoked or dried <sup>5</sup>           | 16 (50.0)              | 5 (45.5)              | 7 (58.3)              | 28 (50.9) | (105.9, 185.2)<br>---   | (121.5, 314.7)<br>---   | (106.7, 566.0)<br>---   | (106.7, 207.8)<br>---   |
| Fish, canned tuna                                   | 25 (80.7)              | 9 (81.8)              | 11 (91.7)             | 45 (83.3) | 260.0                   | 280.0                   | 260.0                   | 260.0                   |
| Egg, chicken, raw                                   | 29 (93.6) <sup>a</sup> | 2 (18.2) <sup>b</sup> | 4 (33.3) <sup>b</sup> | 35 (64.8) | (250.0, 280.0)<br>179.0 | (260.0, 280.0)<br>354.2 | (209.7, 280.0)<br>206.1 | (240.0, 280.0)<br>181.8 |
|                                                     |                        |                       |                       |           | (149.5, 224.3)          | (214.4, 494.1)          | (112.9, 311.9)          | (151.5, 233.5)          |
| <i>Vegetables<sup>6</sup></i>                       |                        |                       |                       |           |                         |                         |                         |                         |
| <i>Vitamin A source dark green leafy vegetables</i> |                        |                       |                       |           |                         |                         |                         |                         |
| Baobab leaves, dried                                | 30 (93.8)              | 10 (90.9)             | 10 (83.3)             | 50 (90.9) | 46.3                    | 58.2                    | 40.9                    | 46.3                    |
|                                                     |                        |                       |                       |           | (35.1, 69.4)            | (31.6, 73.5)            | (35.2, 54.0)            | (35.1, 69.4)            |
| Jute leaves, dried                                  | 26 (81.3)              | 7 (63.6)              | 6 (50.0)              | 39 (70.9) | 63.6                    | 86.2                    | 42.9                    | 63.6                    |
|                                                     |                        |                       |                       |           | (29.4, 75.8)            | (12.9, 121.0)           | (26.0, 75.8)            | (29.3, 80.7)            |
| Moringa leaves, fresh, boiled                       | 9 (28.1)               | 0 (0.0)               | 3 (25.0)              | 12 (21.8) | 46.7                    | ---                     | 54.5                    | 48.9                    |
|                                                     |                        |                       |                       |           | (37.3, 54.1)            |                         | (34.7, 62.5)            | (36.0, 58.5)            |
| Moringa leaves, dried                               | 11 (34.4)              | 4 (36.4)              | 1 (8.3)               | 16 (29.1) | 125.0                   | 49.3                    | 114.9                   | 112.4                   |
|                                                     |                        |                       |                       |           | (93.8, 190.6)           | (25.5, 83.2)            |                         | (70.3, 172.5)           |
| Roselle leaves, fresh                               | 25 (78.1) <sup>a</sup> | 4 (36.4) <sup>b</sup> | 9 (75.0) <sup>a</sup> | 38 (69.1) | 21.6                    | 30.3                    | 22.3                    | 22.3                    |
|                                                     |                        |                       |                       |           | (16.0, 28.4)            | (23.7, 45.9)            | (13.1, 31.3)            | (16.0, 32.6)            |
| Roselle leaves, dried                               | 21 (65.6)              | 6 (54.6)              | 10 (83.3)             | 37 (67.3) | 51.5                    | 41.4                    | 41.0                    | 49.5                    |
|                                                     |                        |                       |                       |           | (30.1, 78.1)            | (31.7, 53.2)            | (34.7, 67.6)            | (30.1, 73.5)            |



|                                          |                        |                       |                        |           |                                     |                                     |                                   |                         |
|------------------------------------------|------------------------|-----------------------|------------------------|-----------|-------------------------------------|-------------------------------------|-----------------------------------|-------------------------|
| Leaves, other, fresh, boiled             | 13 (40.6)              | 0 (0.0)               | 3 (25.0)               | 16 (29.1) | 50.0<br>(24.6, 100.0)               | ---                                 | 106.9<br>(33.7, 180.2)            | 50.0<br>(24.6, 100.0)   |
| Lettuce, fresh                           | 13 (40.6)              | 6 (54.6)              | 9 (75.0)               | 28 (50.9) | 79.0<br>(31.1, 110.2)               | 41.1<br>(20.6, 95.9)                | 29.6<br>(16.6, 40.8)              | 44.1<br>(27.7, 94.9)    |
| <i>Vitamin A source other vegetables</i> |                        |                       |                        |           |                                     |                                     |                                   |                         |
| Carrots, fresh                           | 7 (21.9)               | 3 (27.3)              | 7 (58.3)               | 17 (30.9) | 102.1<br>(99.1, 107.0)              | 43.2<br>(19.2, 80.3)                | 27.0<br>(15.7, 89.2)              | 80.3<br>(27.0, 102.1)   |
| Squash, orange flesh, fresh              | 27 (84.4)              | 8 (72.7)              | 12 (100)               | 47 (85.5) | 33.2 <sup>a</sup><br>(24.1, 38.2)   | 21.6 <sup>a,b</sup><br>(16.8, 48.1) | 15.2 <sup>b</sup><br>(9.6, 26.1)  | 26.5*<br>(18.8, 35.0)   |
| <i>Vitamin C rich vegetables</i>         |                        |                       |                        |           |                                     |                                     |                                   |                         |
| Okra, fresh                              | 11 (34.4)              | 0 (0.0)               | 2 (16.7)               | 13 (23.6) | 110.7<br>(83.1, 122.8)              | ---                                 | 135.0<br>(84.9, 185.2)            | 110.7<br>(84.9, 122.8)  |
| Okra, dried                              | 26 (81.3)              | 10 (90.9)             | 11 (91.7)              | 47 (85.5) | 185.2<br>(65.8, 333.3)              | 129.0<br>(57.0, 217.4)              | 185.2<br>(122.0, 303.0)           | 179.5<br>(80.6, 303.0)  |
| Cabbage, fresh                           | 11 (34.4)              | 5 (45.5)              | 8 (66.7)               | 24 (43.6) | 56.8 <sup>a</sup><br>(27.8, 106.3)  | 33.2 <sup>a,b</sup><br>(30.1, 45.1) | 13.2 <sup>b</sup><br>(9.6, 27.1)  | 29.0*<br>(20.0, 58.1)   |
| Peppers, sweet, fresh                    | 10 (31.3)              | 2 (18.2)              | 4 (33.3)               | 16 (29.1) | 148.8<br>(143.4, 200.8)             | 152.9<br>(54.8, 251.0)              | 139.9<br>(88.0, 198.1)            | 148.8<br>(96.6, 209.9)  |
| Zucchini, green, fresh                   | 15 (46.9)              | 2 (18.2)              | 5 (41.7)               | 22 (40.0) | 15.5<br>(14.6, 28.3)                | 13.7<br>(9.9, 17.5)                 | 13.6<br>(11.5, 15.3)              | 15.5<br>(13.4, 23.1)    |
| <i>Other vegetables</i>                  |                        |                       |                        |           |                                     |                                     |                                   |                         |
| Eggplant, fresh                          | 10 (31.3)              | 2 (18.2)              | 4 (33.3)               | 16 (29.1) | 54.0<br>(42.1, 104.6)               | 55.0<br>(10.4, 99.6)                | 44.6<br>(41.3, 47.1)              | 47.4<br>(40.6, 93.9)    |
| Tomato, fresh                            | 12 (37.5)              | 7 (63.6)              | 12 (100)               | 31 (56.4) | 70.4 <sup>a</sup><br>(58.5, 123.5)  | 35.2 <sup>b</sup><br>(28.9, 44.6)   | 31.5 <sup>b</sup><br>(14.3, 55.2) | 53.2*<br>(29.8, 69.4)   |
| <i>Condiment vegetables</i>              |                        |                       |                        |           |                                     |                                     |                                   |                         |
| Onion, fresh                             | 31 (96.9)              | 11 (100)              | 12 (100)               | 54 (98.2) | 27.9 <sup>a,b</sup><br>(20.2, 49.1) | 53.5 <sup>a</sup><br>(36.6, 61.1)   | 20.9 <sup>b</sup><br>(13.1, 32.2) | 31.9*<br>(20.2, 53.5)   |
| Tomato, dried, powdered                  | 29 (90.6) <sup>a</sup> | 3 (27.3) <sup>b</sup> | 10 (83.3) <sup>a</sup> | 42 (76.4) | 125.0 (70.1,<br>162.0)              | 35.3 (34.9,<br>238.1)               | 123.8 (92.6,<br>161.3)            | 125.0 (71.8,<br>161.3)  |
| Tomato, paste                            | 32 (100)               | 10 (90.9)             | 11 (91.7)              | 53 (96.4) | 142.9 (125.0,<br>145.0)             | 142.9 (133.3,<br>151.5)             | 142.9 (108.7,<br>178.6)           | 142.9 (125.0,<br>151.5) |
| <i>Fruits<sup>6</sup></i>                |                        |                       |                        |           |                                     |                                     |                                   |                         |
| <i>Vitamin C rich fruit</i>              |                        |                       |                        |           |                                     |                                     |                                   |                         |
| Baobab fruit, fresh, raw                 | 13 (40.3)              | 5 (45.5)              | 2 (16.7)               | 20 (36.4) | 188.6<br>(144.0, 443.3)             | 129.4<br>(128.5, 209.5)             | 268.5<br>(148.8, 388.2)           | 174.0<br>(137.4, 356.0) |

|                                                 |           |           |           |            |                                      |                                     |                                   |                         |
|-------------------------------------------------|-----------|-----------|-----------|------------|--------------------------------------|-------------------------------------|-----------------------------------|-------------------------|
| Citrus, fresh, raw<br>(lemon, lime, grapefruit) | 24 (75.0) | 6 (54.6)  | 5 (41.7)  | 35 (63.6)  | 100.2<br>(86.8, 126.0)               | 85.6<br>(62.0, 111.6)               | 88.8<br>(83.1, 156.3)             | 98.9<br>(80.2, 126.0)   |
| Guava, fresh, raw                               | 10 (31.3) | 1 (9.1)   | 0 (0)     | 11 (20.0)  | 58.7<br>(44.2, 118.7)                | 32.7                                | ---                               | 50.6<br>(33.7, 118.7)   |
| Jujube, fresh, raw                              | 9 (28.1)  | 1 (9.1)   | 6 (50.0)  | 16 (29.1)  | 23.9<br>(11.3, 28.9)                 | 23.8                                | 18.0<br>(17.9, 21.5)              | 21.6<br>(14.6, 26.1)    |
| Mango, fresh, raw                               | 10 (32.3) | 2 (18.2)  | 12 (100)  | 24 (44.4)* | 41.8<br>(32.5, 43.9)                 | 51.3<br>(15.6, 86.9)                | 29.5<br>(21.4, 40.0)              | 35.6<br>(23.1, 43.9)    |
| Orange, fresh, raw                              | 21 (67.7) | 5 (45.5)  | 9 (75.0)  | 35 (64.8)  | 66.7<br>(48.7, 69.9)                 | 48.0<br>(42.3, 82.9)                | 37.8<br>(31.1, 48.7)              | 54.1<br>(37.8, 69.9)    |
| Palm fruit, fresh, raw                          | 16 (50.0) | 3 (27.3)  | 4 (33.3)  | 23 (41.8)  | 41.4<br>(19.1, 103.3)                | 51.1<br>(25.1, 54.3)                | 28.9<br>(16.5, 44.7)              | 40.9<br>(19.0, 54.3)    |
| Pineapple, fresh raw                            | 11 (35.5) | 2 (18.2)  | 2 (16.7)  | 15 (27.8)  | 146.1<br>(101.6, 198.1)              | 139.7<br>(111.4, 168.1)             | 202.5<br>(90.7, 314.2)            | 146.1<br>(101.6, 198.1) |
| <i>Other fruit</i>                              |           |           |           |            |                                      |                                     |                                   |                         |
| Banana, ripe, fresh, raw                        | 12 (38.7) | 3 (27.7)  | 2 (16.7)  | 17 (31.5)  | 116.3<br>(78.3, 128.9)               | 116.6<br>(97.0, 153.2)              | 59.3<br>(53.3, 65.1)              | 115.3<br>(78.2, 124.8)  |
| Dates, fresh, raw                               | 29 (90.6) | 8 (72.7)  | 10 (83.3) | 45 (85.5)  | 73.1 <sup>a,b</sup><br>(61.7, 111.1) | 104.4 <sup>a</sup><br>(92.9, 126.1) | 52.8 <sup>b</sup><br>(45.2, 63.1) | 77.0<br>(60.4, 106.8)   |
| Desert date, fresh, raw                         | 18 (56.3) | 4 (36.4)  | 3 (25.0)  | 25 (45.5)  | 18.5 <sup>a,b</sup><br>(16.0, 24.0)  | 24.6 <sup>a</sup><br>(20.2, 33.4)   | 12.5 <sup>b</sup><br>(5.8, 16.0)  | 18.4<br>(16.0, 24.0)    |
| Tamarind, fresh, raw                            | 30 (93.8) | 10 (90.9) | 11 (91.7) | 51 (92.7)  | 76.0<br>(66.5, 95.0)                 | 80.6<br>(54.3, 84.4)                | 73.9<br>(38.0, 84.4)              | 75.4<br>(56.6, 84.4)    |
| Watermelon, fresh, raw                          | 18 (56.3) | 3 (27.3)  | 6 (50.0)  | 27 (49.1)  | 73.6 <sup>a</sup><br>(68.7, 169.2)   | 36.4 <sup>a,b</sup><br>(32.5, 45.3) | 30.4 <sup>b</sup><br>(23.8, 69.2) | 69.5<br>(35.6, 106.3)   |
| <i>Miscellaneous</i>                            |           |           |           |            |                                      |                                     |                                   |                         |
| Salt, table                                     | 32 (100)  | 11 (100)  | 12 (100)  | 55 (100)   | 24.3<br>(18.8, 26.9)                 | 24.8<br>(16.6, 27.8)                | 23.1<br>(20.1, 25.8)              | 24.3<br>(18.8, 26.3)    |
| Bouillon cubed, dry                             | 32 (100)  | 11 (100)  | 12 (100)  | 55 (100)   | 250.0<br>(200.0, 250.0)              | 250.0<br>(250.0, 300.0)             | 250.0<br>(229.2, 300.0)           | 250.0<br>(204.2, 300.0) |

<sup>1</sup>Data are presented for foods recorded as being available in at least 11 of the 55 market surveys completed. <sup>2</sup>Includes data for vegetable oil, not otherwise specified. <sup>3</sup> Availability data are for groundnuts (shelled or unshelled); price data are based on the less expensive of the two forms (edible portion only), if both forms were recorded as being available in the same market survey. <sup>4</sup>Poultry weights are from [27], edible portion only (chicken and guinea fowl: 1,046 g; duck: 1,268 g; pigeon: 199 g). <sup>5</sup> Availability data are for fish (fresh, smoked or dried); price data were variable depending on source and preparation and of insufficient sample size to present for one type only. <sup>6</sup> Food groups and sub-groups are defined in the Optifood software tool; vitamin A source vegetables have  $\geq 60$  RAE/100 g edible portion, vitamin C-rich fruits and vegetables have  $\geq 18$  mg/100 grams edible portion.

**Table S6.** The nutrient content of optimal diets with and without considering reported food patterns (module II), expressed as a percentage of Recommended Dietary Allowances (RDA) among pregnant women<sup>1,2</sup>.

| Analysis <sup>3</sup>                  | % of RDA  |           |         |            |        |                        |        |                         |       |       |                      |
|----------------------------------------|-----------|-----------|---------|------------|--------|------------------------|--------|-------------------------|-------|-------|----------------------|
|                                        | Vitamin A | Vitamin C | Thiamin | Riboflavin | Niacin | Vitamin B <sub>6</sub> | Folate | Vitamin B <sub>12</sub> | Iron  | Zinc  | Calcium <sup>4</sup> |
| <b>Reported energy intake</b>          |           |           |         |            |        |                        |        |                         |       |       |                      |
| Optimal diet, with food patterns       | 49.8      | 24.7      | 65.0    | 56.8       | 40.8   | 97.9                   | 40.8   | 3.8                     | 100.0 | 125.5 | 29.1                 |
| Optimal diet, without food patterns    | 65.0      | 38.4      | 71.6    | 69.7       | 48.7   | 86.2                   | 67.9   | 23.8                    | 100.0 | 148.9 | 47.9                 |
| <b>Reported energy intake + IFA</b>    |           |           |         |            |        |                        |        |                         |       |       |                      |
| Optimal diet, with food patterns       | 48.1      | 25.7      | 68.0    | 53.1       | 42.9   | 100.0                  | 153.9  | 4.2                     | 308.2 | 122.4 | 29.4                 |
| Optimal diet, without food patterns    | 76.9      | 39.2      | 66.6    | 70.3       | 44.8   | 96.3                   | 167.5  | 24.1                    | 328.6 | 157.8 | 50.9                 |
| <b>Added meal</b>                      |           |           |         |            |        |                        |        |                         |       |       |                      |
| Optimal diet, with food patterns       | 61.5      | 32.2      | 93.7    | 72.9       | 62.1   | 121.6                  | 47.4   | 4.9                     | 108.0 | 164.0 | 26.5                 |
| Optimal diet, without food patterns    | 100.0     | 64.9      | 100.0   | 100.0      | 72.0   | 110.7                  | 100.0  | 45.4                    | 105.3 | 215.6 | 80.7                 |
| <b>Added meal + IFA</b>                |           |           |         |            |        |                        |        |                         |       |       |                      |
| Optimal diet, with food patterns       | 60.7      | 33.6      | 94.7    | 73.7       | 61.8   | 121.9                  | 160.0  | 4.8                     | 323.2 | 163.9 | 25.9                 |
| Optimal diet, without food patterns    | 100.0     | 64.8      | 100.0   | 100.0      | 73.4   | 113.8                  | 199.5  | 45.7                    | 323.2 | 216.4 | 80.1                 |
| <b>Added meal + UNIMMAP</b>            |           |           |         |            |        |                        |        |                         |       |       |                      |
| Optimal diet, with food patterns       | 146.7     | 101.4     | 188.8   | 158.5      | 161.5  | 236.4                  | 154.3  | 104.0                   | 203.2 | 288.0 | 37.8                 |
| Optimal diet, without food patterns    | 188.7     | 130.0     | 194.1   | 202.5      | 165.9  | 230.0                  | 219.0  | 145.3                   | 261.9 | 368.8 | 86.6                 |
| <b>Added meal + Supercereal (CSB+)</b> |           |           |         |            |        |                        |        |                         |       |       |                      |



|                                        |       |       |       |       |       |       |       |       |       |       |       |
|----------------------------------------|-------|-------|-------|-------|-------|-------|-------|-------|-------|-------|-------|
| Optimal diet, with food patterns       | 45.3  | 39.6  | 89.8  | 91.1  | 60.5  | 132.6 | 64.3  | 4.5   | 249.9 | 194.4 | 45.9  |
| Optimal diet, without food patterns    | 80.1  | 67.2  | 100.0 | 100.0 | 80.8  | 105.3 | 100.0 | 39.4  | 181.9 | 212.6 | 85.4  |
| <b>Added meal + UNIMMAP</b>            |       |       |       |       |       |       |       |       |       |       |       |
| Optimal diet, with food patterns       | 105.2 | 97.7  | 189.1 | 176.0 | 166.2 | 230.6 | 199.9 | 97.6  | 418.2 | 320.1 | 49.1  |
| Optimal diet, without food patterns    | 126.2 | 113.5 | 196.5 | 194.5 | 183.4 | 220.1 | 240.9 | 132.4 | 423.4 | 365.4 | 88.2  |
| <b>Added meal + Supercereal (CSB+)</b> |       |       |       |       |       |       |       |       |       |       |       |
| Optimal diet, with food patterns       | 119.0 | 100.1 | 116.8 | 177.2 | 112.0 | 187.9 | 89.4  | 75.7  | 282.2 | 233.2 | 99.0  |
| Optimal diet, without food patterns    | 129.5 | 99.0  | 132.3 | 166.6 | 125.0 | 179.5 | 100.7 | 99.0  | 170.1 | 252.7 | 107.8 |
| <b>Added meal + SQ-LNS P &amp; L</b>   |       |       |       |       |       |       |       |       |       |       |       |
| Optimal diet, with food patterns       | 105.5 | 121.7 | 284.4 | 261.1 | 269.6 | 321.0 | 197.5 | 190.5 | 352.1 | 436.9 | 77.8  |
| Optimal diet, without food patterns    | 99.0  | 112.5 | 309.0 | 250.6 | 292.2 | 315.7 | 238.1 | 215.4 | 249.4 | 451.8 | 99.0  |
| <b>Added meal + Plumpy'Mum</b>         |       |       |       |       |       |       |       |       |       |       |       |
| Optimal diet, with food patterns       | 157.6 | 102.8 | 185.9 | 157.4 | 168.9 | 217.7 | 169.3 | 102.8 | 190.6 | 268.3 | 47.1  |
| Optimal diet, without food patterns    | 164.3 | 131.3 | 197.2 | 206.6 | 177.1 | 221.8 | 234.9 | 144.1 | 262.3 | 365.1 | 96.7  |

<sup>1</sup> CSB+, corn soy blend plus; IFA, iron and folic acid supplement; SQ-LNS, small-quantity lipid-based nutrient supplement; P&L, pregnancy and lactation. <sup>2</sup> **Optimal diet, with food patterns:** Diet that comes as close as possible to achieving the target population RDA for all nutrients, while adhering to dietary patterns (median food group consumption) as much as possible. These diets minimize the sum of the deviations from the RDA for all nutrients, and minimize deviations from food patterns. **Optimal diet, without food patterns:** Diet that comes as close as possible to achieving the target population RDA for all nutrients, not accounting for dietary patterns. These diets minimize the sum of the deviations from the RDA for all nutrients (but are only subject to maximum and minimum food group constraints). Large differences in % RDA between the two diets can be used to identify food groups and food sub-groups which changed substantially between the two diets, and can be used to generate food based

recommendations. <sup>3</sup>Energy constraints, food serving sizes and food consumption patterns are presented in Tables 1 and 4, and Supplemental Tables 1-3. <sup>4</sup>Series modeled using calcium RDA of 1000 mg/d.

**Table S8.** The nutrient content of worst-case and best-case scenario diets without food-based recommendations (module III), and food-based recommendations with the greatest nutritional impact expressed as a percentage of Recommended Dietary Allowances (RDA) among pregnant and lactating women <sup>1,2</sup>.

| Analysis <sup>3</sup>                  | % of RDA  |           |         |            |        |                        |        |                         |       |       |                      | No. MN Adequate | Cost of Diet (€/d) |
|----------------------------------------|-----------|-----------|---------|------------|--------|------------------------|--------|-------------------------|-------|-------|----------------------|-----------------|--------------------|
|                                        | Vitamin A | Vitamin C | Thiamin | Riboflavin | Niacin | Vitamin B <sub>6</sub> | Folate | Vitamin B <sub>12</sub> | Iron  | Zinc  | Calcium <sup>4</sup> |                 |                    |
| <b>Pregnant Women</b>                  |           |           |         |            |        |                        |        |                         |       |       |                      |                 |                    |
| <b>Added meal + 1 egg/d</b>            |           |           |         |            |        |                        |        |                         |       |       |                      |                 |                    |
| Best modeled FBR (worst-case scenario) | 86.9      | 26.3      | 79.4    | 103.4      | 51.1   | 109.5                  | 78.3   | 67.0                    | 109.0 | 213.1 | 69.6                 | 9               | 0.60               |
| <b>Added meal + 100 g red meat/d</b>   |           |           |         |            |        |                        |        |                         |       |       |                      |                 |                    |
| Best modeled FBR (worst-case scenario) | 74.5      | 26.3      | 81.6    | 97.0       | 84.3   | 109.8                  | 76.3   | 138.4                   | 112.3 | 245.1 | 68.0                 | 10              | 0.68               |
| <b>Lactating Women</b>                 |           |           |         |            |        |                        |        |                         |       |       |                      |                 |                    |
| <b>Added meal + 1 egg/d</b>            |           |           |         |            |        |                        |        |                         |       |       |                      |                 |                    |
| Best modeled FBR (worst-case scenario) | 21.1      | 15.1      | 80.3    | 89.0       | 55.2   | 114.3                  | 75.3   | 62.3                    | 185.3 | 210.3 | 68.6                 | 7               | 0.60               |
| <b>Added meal + 100 g red meat/d</b>   |           |           |         |            |        |                        |        |                         |       |       |                      |                 |                    |
| Best modeled FBR (worst-case scenario) | 13.7      | 15.1      | 83.2    | 83.9       | 91.6   | 117.0                  | 73.1   | 128.5                   | 190.8 | 241.8 | 67.0                 | 9               | 0.68               |

<sup>1</sup>RDA, recommended dietary allowances. <sup>2</sup> Worst-case scenario: diets sequentially modeled for each micronutrient, which would provide the least possible amount (expressed as % of the RDA) of that micronutrient. Dietary adequacy for each nutrient was defined as the worst-case scenario for that nutrient being  $\geq 65\%$  of the RDA (shaded); if the worst-case scenario is less than 65% (non-shaded) of the RDA, the nutrient is likely to be inadequate in the population, given local food supply and food patterns. <sup>3</sup> Energy constraints, food serving sizes and food consumption patterns are presented in Tables 1 and 4, and Supplemental Tables 1-3. Best-modeled FBR for

pregnant women included (per week): 7 eggs or 700 g red meat, 21 servings of dark green leafy vegetables, 14 servings of milk, 14 servings of millet, 21 servings of vitamin A fortified vegetable oil and 21 servings of cooked beans/lentils/peas. Best-modeled FBR for lactating women included (per week): 7 eggs or 700 g red meat, 21 servings of dark green leafy vegetables, 14 servings of milk, 14 servings of millet and 21 servings of cooked beans/lentils/peas. <sup>4</sup>Series modeled using calcium RDA of 1000 mg/d.

**Table S9.** The nutrient content of worst-case and best-case scenario diets without food-based recommendations (module III), and food-based recommendations with the greatest nutritional impact expressed as a percentage of Recommended Dietary Allowances (RDA) among pregnant women, using lower calcium recommendations (775 mg/d) <sup>1,2</sup>.

| Analysis <sup>3</sup>                  | % of RDA  |           |         |            |        |                        |        |                         |       |       |                      | No. MN Adequate | Cost of Diet (€/d) |
|----------------------------------------|-----------|-----------|---------|------------|--------|------------------------|--------|-------------------------|-------|-------|----------------------|-----------------|--------------------|
|                                        | Vitamin A | Vitamin C | Thiamin | Riboflavin | Niacin | Vitamin B <sub>6</sub> | Folate | Vitamin B <sub>12</sub> | Iron  | Zinc  | Calcium <sup>4</sup> |                 |                    |
| Added meal + UNIMMAP                   |           |           |         |            |        |                        |        |                         |       |       |                      |                 |                    |
| Best modeled FBR (worst-case scenario) | 134.0     | 107.8     | 152.9   | 160.0      | 151.4  | 184.5                  | 128.3  | 139.2                   | 152.4 | 302.7 | 75.5                 | 11              | 0.36               |
| Added meal + Supercereal (CSB+)        |           |           |         |            |        |                        |        |                         |       |       |                      |                 |                    |
| Best modeled FBR (worst-case scenario) | 142.6     | 86.4      | 85.5    | 133.7      | 86.6   | 117.3                  | 69.0   | 79.2                    | 73.6  | 145.1 | 69.9                 | 11              | 0.19               |
| Added meal + SQ-LNS P & L              |           |           |         |            |        |                        |        |                         |       |       |                      |                 |                    |
| Best modeled FBR (worst-case scenario) | 122.1     | 140.5     | 252.4   | 240.7      | 242.9  | 284.4                  | 127.4  | 202.1                   | 115.4 | 373.0 | 72.6                 | 11              | 0.22               |
| Added meal + Plumpy'Mum                |           |           |         |            |        |                        |        |                         |       |       |                      |                 |                    |
| Best modeled FBR (worst-case scenario) | 138.5     | 107.7     | 146.0   | 154.7      | 153.6  | 166.5                  | 141.5  | 119.3                   | 158.2 | 253.1 | 68.8                 | 11              | 0.23               |

<sup>1</sup> CSB+, corn soy blend plus; SQ-LNS, small-quantity lipid-based nutrient supplement; P&L, pregnancy and lactation. <sup>2</sup>Worst-case scenario: diets sequentially modeled for each micronutrient, which would provide the least possible amount (expressed as % of the RDA) of that micronutrient. Dietary adequacy for each nutrient was defined as the worst-case scenario for that nutrient being  $\geq 65\%$  of the RDA (shaded); if the worst-case scenario is less than 65% (non-shaded) of the RDA, the nutrient is likely to be

inadequate in the population, given local food supply and food patterns. <sup>3</sup>Energy constraints, food serving sizes and food consumption patterns are presented in Tables 1 and 4, and Supplemental Tables 1-3. Best-modeled FBR are presented in Table S11 for each series. <sup>4</sup>Series modeled using calcium RDA of 775 mg/d.

**Table S10.** The nutrient content of worst-case and best-case scenario diets without food-based recommendations (module III), and food-based recommendations with the greatest nutritional impact expressed as a percentage of Recommended Dietary Allowances (RDA) among lactating women, using lower calcium recommendations (800 mg/d) <sup>1,2</sup>.

| Analysis <sup>3</sup>                  | % of RDA  |           |         |            |        |                        |        |                         |       |       |                      | No. MN Adequate | Cost of Diet (€/d) |
|----------------------------------------|-----------|-----------|---------|------------|--------|------------------------|--------|-------------------------|-------|-------|----------------------|-----------------|--------------------|
|                                        | Vitamin A | Vitamin C | Thiamin | Riboflavin | Niacin | Vitamin B <sub>6</sub> | Folate | Vitamin B <sub>12</sub> | Iron  | Zinc  | Calcium <sup>4</sup> |                 |                    |
| Added meal + UNIMMAP                   |           |           |         |            |        |                        |        |                         |       |       |                      |                 |                    |
| Best modeled FBR (worst-case scenario) | 75.1      | 72.9      | 156.2   | 135.9      | 161.0  | 175.1                  | 152.0  | 129.4                   | 234.7 | 286.0 | 71.8                 | 11              | 0.38               |
| Added meal + Supercereal (CSB+)        |           |           |         |            |        |                        |        |                         |       |       |                      |                 |                    |
| Best modeled FBR (worst-case scenario) | 88.9      | 69.7      | 91.3    | 123.6      | 97.1   | 129.1                  | 74.6   | 73.6                    | 125.2 | 143.3 | 87.1                 | 11              | 0.21               |
| Added meal + SQ-LNS P & L              |           |           |         |            |        |                        |        |                         |       |       |                      |                 |                    |
| Best modeled FBR (worst-case scenario) | 68.0      | 96.1      | 250.8   | 204.9      | 255.4  | 265.1                  | 149.6  | 187.7                   | 174.9 | 341.4 | 68.6                 | 11              | 0.23               |
| Added meal + Plumpy'Mum                |           |           |         |            |        |                        |        |                         |       |       |                      |                 |                    |
| Best modeled FBR (worst-case scenario) | 77.8      | 72.8      | 152.0   | 131.2      | 164.0  | 162.4                  | 168.7  | 110.9                   | 243.4 | 242.2 | 65.2                 | 11              | 0.25               |

<sup>1</sup>CSB+, corn soy blend plus; SQ-LNS, small-quantity lipid-based nutrient supplement; P&L, pregnancy and lactation. <sup>2</sup>Worst-case scenario: diets sequentially modeled for each micronutrient, which would provide the least possible amount (expressed as % of the RDA) of that micronutrient. Dietary adequacy for each nutrient was defined as the worst-case scenario for that nutrient being  $\geq 65\%$  of the RDA (shaded); if the worst-case scenario is less than 65% (non-shaded) of the RDA, the nutrient is likely to be inadequate in the population, given local food supply and food patterns. <sup>3</sup>Energy constraints, food serving sizes and food consumption patterns are presented in Tables 1 and 4, and Supplemental Tables 1-3. Best-modeled FBR are presented in Table S11 for each series. <sup>4</sup>Series modeled using calcium RDA of 800 mg/d.



**Table S11.** Food-based recommendations for pregnant and lactating women using lower calcium recommendations (775-800 mg/d), by model series and intervention product <sup>1</sup>

|                                      | <b>Pregnant Women</b>                                                                                  | <b>No. MN Adequate <sup>2</sup></b> | <b>Lactating Women</b>                                                                                                      | <b>No. MN Adequate</b> |
|--------------------------------------|--------------------------------------------------------------------------------------------------------|-------------------------------------|-----------------------------------------------------------------------------------------------------------------------------|------------------------|
| Added meal diet + UNIMMAP            | <ul style="list-style-type: none"> <li>• 21 servings of DGLV</li> <li>• 14 servings of milk</li> </ul> | 11                                  | <ul style="list-style-type: none"> <li>• 21 servings of DGLV</li> <li>• 14 servings of milk</li> </ul>                      | 11                     |
| Added meal diet + Supercereal (CSB+) | <ul style="list-style-type: none"> <li>• 14 servings of cooked beans/lentils/peas</li> </ul>           | 11                                  | <ul style="list-style-type: none"> <li>• 14 servings of DGLV</li> <li>• 14 servings of cooked beans/lentils/peas</li> </ul> | 11                     |
| Added meal + SQ-LNS (P&L)            | <ul style="list-style-type: none"> <li>• 21 servings of DGLV</li> </ul>                                | 11                                  | <ul style="list-style-type: none"> <li>• 21 servings of DGLV</li> </ul>                                                     | 11                     |
| Added meal diet + Plumpy'Mum         | <ul style="list-style-type: none"> <li>• 21 servings of DGLV</li> <li>• 7 servings of milk</li> </ul>  | 11                                  | <ul style="list-style-type: none"> <li>• 21 servings of DGLV</li> <li>• 7 servings of milk</li> </ul>                       | 11                     |

<sup>1</sup> CSB+, corn soy blend plus; DGLV, dark green leafy vegetables; MN, micronutrients; SQ-LNS, small-quantity lipid-based nutrient supplement; P&L, pregnancy and lactation. <sup>2</sup> Maximum number of micronutrients with the potential to be adequate,  $n = 11$ . <sup>3</sup> Added meal diet: model energy constraint increased above the reported diet to approximate the provision of an "added meal" (~600 kcal) per day among pregnant women or to match estimated energy requirements in lactating women, in addition to the best set of food-based recommendations.
